# Supplementary material for: An Improved Particle Swarm Optimization with Biogeography‐Based Learning Strategy for Economic Dispatch Problems
Source: Hindawi journal article supplement (doi:10.1155/2018/7289674), 2018-01-01
Supplement: f1 [file 7289674.f1.pdf]

**Table S1:** The system data of test system 1 (6-unit system)

| Unit | $a$ | $b$  | $c$    | $P^{min}$ | $P^{max}$ | $P^0$ | $UR$ | $DR$ | POZ                    |
|------|-----|------|--------|-----------|-----------|-------|------|------|------------------------|
| 1    | 240 | 7    | 0.007  | 100       | 500       | 440   | 80   | 120  | [210, 240];[350, 380]  |
| 2    | 200 | 10   | 0.0095 | 50        | 200       | 170   | 50   | 90   | [90, 110]; [140, 160]  |
| 3    | 220 | 8.5  | 0.009  | 80        | 300       | 200   | 65   | 100  | [150, 170]; [210, 240] |
| 4    | 200 | 11   | 0.009  | 50        | 150       | 150   | 50   | 90   | [80, 90]; [110, 120]   |
| 5    | 220 | 10.5 | 0.008  | 50        | 200       | 190   | 50   | 90   | [90, 110]; [140, 150]  |
| 6    | 190 | 12   | 0.0075 | 50        | 120       | 150   | 50   | 90   | [75, 85]; [100, 105]   |

**Table S2:** The system data of test system 2 (15-unit system)

| Unit | $a$  | $b$ | $c$      | $P^{min}$ | $P^{max}$ | $P^0$ | $UR$ | $DR$ | POZ                           |
|------|------|-----|----------|-----------|-----------|-------|------|------|-------------------------------|
| 1    | 10.1 | 671 | 0.000299 | 150       | 455       | 400   | 80   | 120  | [185 225];[305 335];[420 450] |
| 2    | 10.2 | 574 | 0.000183 | 150       | 455       | 300   | 80   | 120  |                               |
| 3    | 8.8  | 374 | 0.001126 | 20        | 130       | 105   | 130  | 130  |                               |
| 4    | 8.8  | 374 | 0.001126 | 20        | 130       | 100   | 130  | 130  | [180 200];[305 335];[390 420] |
| 5    | 10.4 | 461 | 0.000205 | 150       | 470       | 90    | 80   | 120  |                               |
| 6    | 10.1 | 630 | 0.000301 | 135       | 460       | 400   | 80   | 120  |                               |
| 7    | 9.8  | 548 | 0.000364 | 135       | 465       | 350   | 80   | 120  | [230 255];[365 395];[430 455] |
| 8    | 11.2 | 227 | 0.000338 | 60        | 300       | 95    | 65   | 100  |                               |
| 9    | 11.2 | 173 | 0.000807 | 25        | 162       | 105   | 60   | 100  |                               |
| 10   | 10.7 | 175 | 0.001203 | 25        | 160       | 110   | 60   | 100  | [30 40];[55 65]               |
| 11   | 10.2 | 186 | 0.003586 | 20        | 80        | 60    | 80   | 80   |                               |
| 12   | 9.9  | 230 | 0.005513 | 20        | 80        | 40    | 80   | 80   |                               |
| 13   | 13.1 | 225 | 0.000371 | 25        | 85        | 30    | 80   | 80   |                               |
| 14   | 12.1 | 309 | 0.001929 | 15        | 55        | 20    | 55   | 55   |                               |
| 15   | 12.4 | 323 | 0.004447 | 15        | 55        | 20    | 55   | 55   |                               |

**Table S3:** The system data of test system 3 (20-unit system)

| Unit | $a$  | $b$   | $c$     | $P^{min}$ | $P^{max}$ |
|------|------|-------|---------|-----------|-----------|
| 1    | 1000 | 18.19 | 0.00068 | 150       | 600       |
| 2    | 970  | 19.26 | 0.00071 | 50        | 200       |
| 3    | 600  | 19.8  | 0.0065  | 50        | 200       |
| 4    | 700  | 19.1  | 0.005   | 50        | 200       |
| 5    | 420  | 18.1  | 0.00738 | 50        | 160       |
| 6    | 360  | 19.26 | 0.00612 | 20        | 100       |
| 7    | 490  | 17.14 | 0.0079  | 25        | 125       |
| 8    | 660  | 18.92 | 0.00813 | 50        | 150       |
| 9    | 765  | 18.27 | 0.00522 | 50        | 200       |
| 10   | 770  | 18.92 | 0.00573 | 30        | 150       |
| 11   | 800  | 16.69 | 0.0048  | 100       | 300       |
| 12   | 970  | 16.76 | 0.0031  | 150       | 500       |
| 13   | 900  | 17.36 | 0.0085  | 40        | 160       |
| 14   | 700  | 18.7  | 0.00511 | 20        | 130       |
| 15   | 450  | 18.7  | 0.00398 | 25        | 185       |
| 16   | 370  | 14.26 | 0.0712  | 20        | 80        |
| 17   | 480  | 19.14 | 0.0089  | 30        | 85        |
| 18   | 680  | 18.92 | 0.00713 | 30        | 120       |
| 19   | 700  | 18.47 | 0.00622 | 40        | 120       |
| 20   | 850  | 19.79 | 0.00773 | 30        | 100       |

**Table S4:** The system data of test system 4 (38-unit system)

| Unit | $a$    | $b$    | $c$    | $P^{min}$ | $P^{max}$ |
|------|--------|--------|--------|-----------|-----------|
| 1    | 64782  | 796.9  | 0.3133 | 220       | 550       |
| 2    | 64782  | 796.9  | 0.3133 | 220       | 550       |
| 3    | 64670  | 795.5  | 0.3127 | 200       | 500       |
| 4    | 64670  | 795.5  | 0.3127 | 200       | 500       |
| 5    | 64670  | 795.5  | 0.3127 | 200       | 500       |
| 6    | 64670  | 795.5  | 0.3127 | 200       | 500       |
| 7    | 64670  | 795.5  | 0.3127 | 200       | 500       |
| 8    | 64670  | 795.5  | 0.3127 | 200       | 500       |
| 9    | 172832 | 915.7  | 0.7075 | 114       | 500       |
| 10   | 172832 | 915.7  | 0.7075 | 114       | 500       |
| 11   | 176003 | 884.2  | 0.7515 | 114       | 500       |
| 12   | 173028 | 884.2  | 0.7083 | 114       | 500       |
| 13   | 91340  | 1250.1 | 0.4211 | 110       | 500       |
| 14   | 63440  | 1298.6 | 0.5145 | 90        | 365       |
| 15   | 65468  | 1298.6 | 0.5691 | 82        | 365       |
| 16   | 77282  | 1290.8 | 0.5691 | 120       | 325       |
| 17   | 190928 | 238.1  | 2.5881 | 65        | 315       |
| 18   | 285372 | 1149.5 | 3.8734 | 65        | 315       |
| 19   | 271676 | 1269.1 | 3.6842 | 65        | 315       |
| 20   | 39197  | 696.1  | 0.4921 | 120       | 272       |
| 21   | 45576  | 660.2  | 0.5728 | 120       | 272       |
| 22   | 28770  | 803.2  | 0.3572 | 110       | 260       |
| 23   | 36902  | 818.2  | 0.9415 | 80        | 190       |
| 24   | 105510 | 33.5   | 52.123 | 10        | 150       |
| 25   | 22233  | 805.4  | 1.1421 | 60        | 125       |
| 26   | 30953  | 707.1  | 2.0275 | 55        | 110       |
| 27   | 17044  | 833.6  | 3.0744 | 35        | 75        |
| 28   | 81079  | 2188.7 | 16.765 | 20        | 70        |
| 29   | 124767 | 1024.4 | 26.355 | 20        | 70        |
| 30   | 121915 | 837.1  | 30.575 | 20        | 70        |
| 31   | 120780 | 1305.2 | 25.098 | 20        | 70        |
| 32   | 104441 | 716.6  | 33.722 | 20        | 60        |
| 33   | 83224  | 1633.9 | 23.915 | 25        | 60        |
| 34   | 111281 | 969.6  | 32.562 | 18        | 60        |
| 35   | 64142  | 2625.8 | 18.362 | 8         | 60        |
| 36   | 103519 | 1633.9 | 23.915 | 25        | 60        |
| 37   | 13547  | 694.7  | 8.482  | 20        | 38        |
| 38   | 13518  | 655.9  | 9.693  | 20        | 38        |

**Table S5:** The system data of test system 5 (110-unit system)

| Unit | $a$     | $b$    | $c$    | $P^{min}$ | $P^{max}$ | Unit | $a$     | $b$    | $c$    | $P^{min}$ | $P^{max}$ |
|------|---------|--------|--------|-----------|-----------|------|---------|--------|--------|-----------|-----------|
| 1    | 24.389  | 25.547 | 0.0253 | 12        | 2.4       | 56   | 82.136  | 14.327 | 0.0098 | 96        | 25.2      |
| 2    | 24.411  | 25.675 | 0.0265 | 12        | 2.4       | 57   | 82.298  | 14.354 | 0.0099 | 96        | 25.2      |
| 3    | 24.638  | 25.803 | 0.028  | 12        | 2.4       | 58   | 82.464  | 14.38  | 0.0092 | 100       | 35        |
| 4    | 24.76   | 25.932 | 0.0284 | 12        | 2.4       | 59   | 82.626  | 14.407 | 0.0094 | 100       | 35        |
| 5    | 24.888  | 26.061 | 0.0286 | 12        | 2.4       | 60   | 218.895 | 19     | 0.0072 | 120       | 45        |
| 6    | 117.755 | 37.551 | 0.012  | 20        | 4         | 61   | 219.335 | 19.1   | 0.0071 | 120       | 45        |
| 7    | 118.108 | 37.664 | 0.0126 | 20        | 4         | 62   | 219.775 | 19.2   | 0.007  | 120       | 45        |
| 8    | 118.458 | 37.777 | 0.0136 | 20        | 4         | 63   | 143.735 | 11.694 | 0.0066 | 185       | 54.3      |
| 9    | 118.821 | 37.89  | 0.0143 | 20        | 4         | 64   | 144.029 | 11.715 | 0.0057 | 185       | 54.3      |
| 10   | 81.136  | 13.327 | 0.0088 | 76        | 15.2      | 65   | 144.318 | 11.737 | 0.0058 | 185       | 54.3      |
| 11   | 81.298  | 13.354 | 0.0089 | 76        | 15.2      | 66   | 144.597 | 11.758 | 0.0059 | 185       | 54.3      |
| 12   | 81.464  | 13.8   | 0.0091 | 76        | 15.2      | 67   | 269.131 | 24     | 0.0036 | 197       | 70        |
| 13   | 81.626  | 13.407 | 0.0093 | 76        | 15.2      | 68   | 269.649 | 24.1   | 0.0036 | 197       | 70        |
| 14   | 217.895 | 18     | 0.0062 | 100       | 25        | 69   | 270.176 | 24.2   | 0.0036 | 197       | 70        |
| 15   | 218.335 | 18.1   | 0.0061 | 100       | 25        | 70   | 187.057 | 11.862 | 0.0025 | 360       | 150       |
| 16   | 218.775 | 18.2   | 0.006  | 100       | 25        | 71   | 320.002 | 8.492  | 0.0029 | 400       | 160       |
| 17   | 142.735 | 10.694 | 0.0046 | 155       | 54.3      | 72   | 321.91  | 8.503  | 0.003  | 400       | 160       |
| 18   | 143.029 | 10.715 | 0.0047 | 155       | 54.3      | 73   | 52.136  | 13.327 | 0.0054 | 300       | 60        |
| 19   | 143.318 | 10.737 | 0.0048 | 155       | 54.3      | 74   | 42.298  | 12.354 | 0.0055 | 250       | 50        |
| 20   | 143.597 | 10.758 | 0.0049 | 155       | 54.3      | 75   | 32.464  | 11.38  | 0.0099 | 90        | 30        |
| 21   | 259.131 | 23     | 0.0026 | 197       | 68.9      | 76   | 23.626  | 9.407  | 0.0031 | 50        | 12        |
| 22   | 259.649 | 23.1   | 0.0026 | 197       | 68.9      | 77   | 220     | 14     | 0.0024 | 450       | 160       |
| 23   | 260.176 | 23.2   | 0.0026 | 197       | 68.9      | 78   | 190     | 13.1   | 0.0023 | 600       | 150       |
| 24   | 177.057 | 10.862 | 0.0015 | 350       | 140       | 79   | 250     | 13.2   | 0.0036 | 200       | 50        |
| 25   | 210.002 | 7.492  | 0.0019 | 400       | 100       | 80   | 230     | 13.5   | 0.0049 | 120       | 20        |
| 26   | 211.91  | 7.503  | 0.0019 | 400       | 100       | 81   | 70      | 24     | 0.0061 | 55        | 10        |
| 27   | 210     | 12     | 0.0014 | 500       | 140       | 82   | 60      | 14.5   | 0.007  | 40        | 12        |
| 28   | 180     | 12.1   | 0.0013 | 500       | 140       | 83   | 210     | 14.2   | 0.0088 | 80        | 20        |
| 29   | 240     | 12.2   | 0.0026 | 200       | 50        | 84   | 150     | 13.4   | 0.0022 | 200       | 50        |
| 30   | 220     | 12.5   | 0.0039 | 100       | 25        | 85   | 130     | 11.3   | 0.0048 | 325       | 80        |
| 31   | 60      | 23     | 0.0051 | 50        | 10        | 86   | 80      | 8.9    | 0.0053 | 440       | 120       |
| 32   | 50      | 13.5   | 0.005  | 20        | 5         | 87   | 90      | 14.4   | 0.0021 | 35        | 10        |
| 33   | 200     | 13.2   | 0.0078 | 80        | 20        | 88   | 80      | 14.3   | 0.0033 | 55        | 20        |
| 34   | 140     | 12.4   | 0.0012 | 250       | 75        | 89   | 125     | 13.9   | 0.0034 | 100       | 20        |
| 35   | 120     | 10.3   | 0.0038 | 360       | 110       | 90   | 160     | 13.8   | 0.0037 | 220       | 40        |
| 36   | 90      | 9.9    | 0.0043 | 400       | 130       | 91   | 50      | 13.7   | 0.0066 | 140       | 30        |
| 37   | 80      | 13.4   | 0.0011 | 40        | 10        | 92   | 400     | 13.6   | 0.0043 | 100       | 40        |
| 38   | 70      | 13.3   | 0.0023 | 70        | 20        | 93   | 260     | 8.4    | 0.0022 | 440       | 100       |
| 39   | 115     | 12.9   | 0.0034 | 100       | 25        | 94   | 110     | 7.6    | 0.0055 | 500       | 100       |
| 40   | 150     | 12.8   | 0.0067 | 120       | 20        | 95   | 170     | 7.5    | 0.0032 | 600       | 100       |
| 41   | 40      | 12.7   | 0.0056 | 180       | 40        | 96   | 140     | 7.2    | 0.0077 | 700       | 200       |
| 42   | 300     | 12.6   | 0.0023 | 220       | 50        | 97   | 26.389  | 26.547 | 0.0353 | 15        | 3.6       |
| 43   | 250     | 7.4    | 0.0012 | 440       | 120       | 98   | 25.411  | 26.675 | 0.0365 | 15        | 3.6       |
| 44   | 100     | 6.6    | 0.0045 | 560       | 160       | 99   | 25.638  | 26.803 | 0.038  | 22        | 4.4       |
| 45   | 160     | 6.5    | 0.0022 | 660       | 150       | 100  | 25.76   | 26.932 | 0.0384 | 22        | 4.4       |
| 46   | 130     | 6.2    | 0.0067 | 700       | 200       | 101  | 65      | 15.3   | 0.021  | 60        | 10        |
| 47   | 34.389  | 26.547 | 0.0353 | 32        | 5.4       | 102  | 82      | 16     | 0.023  | 80        | 10        |
| 48   | 34.411  | 26.675 | 0.0365 | 32        | 5.4       | 103  | 86      | 20.2   | 0.024  | 100       | 20        |
| 49   | 34.638  | 26.803 | 0.038  | 52        | 8.4       | 104  | 84      | 20.2   | 0.035  | 120       | 20        |
| 50   | 34.761  | 26.932 | 0.0384 | 52        | 8.4       | 105  | 75      | 25.6   | 0.034  | 150       | 40        |
| 51   | 34.888  | 17.061 | 0.0386 | 52        | 8.4       | 106  | 56      | 30.5   | 0.037  | 280       | 40        |
| 52   | 127.755 | 38.551 | 0.032  | 60        | 12        | 107  | 67      | 32.5   | 0.039  | 520       | 50        |
| 53   | 128.108 | 36.664 | 0.0326 | 60        | 12        | 108  | 68      | 26     | 0.035  | 150       | 30        |
| 54   | 128.458 | 38.777 | 0.0236 | 60        | 12        | 109  | 69      | 25.8   | 0.028  | 320       | 40        |
| 55   | 128.821 | 38.89  | 0.0243 | 60        | 12        | 110  | 72      | 27     | 0.026  | 200       | 20        |
